# Supplementary material for: Possible Role of Docosahexaenoic Acid in Response to Diarrhetic Shellfish Toxins in the Mussel Perna viridis
Source: MDPI journal article supplement (doi:10.3390/md21030155), 2023-02-25
Supplement: s1 [file s1]

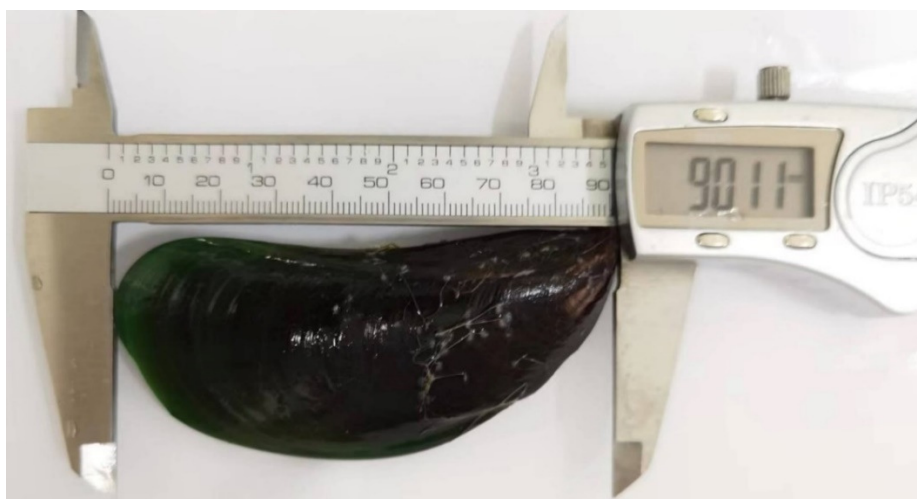

**Supplementary Figure S1** The morphology of *Perna viridis* in the experiment.

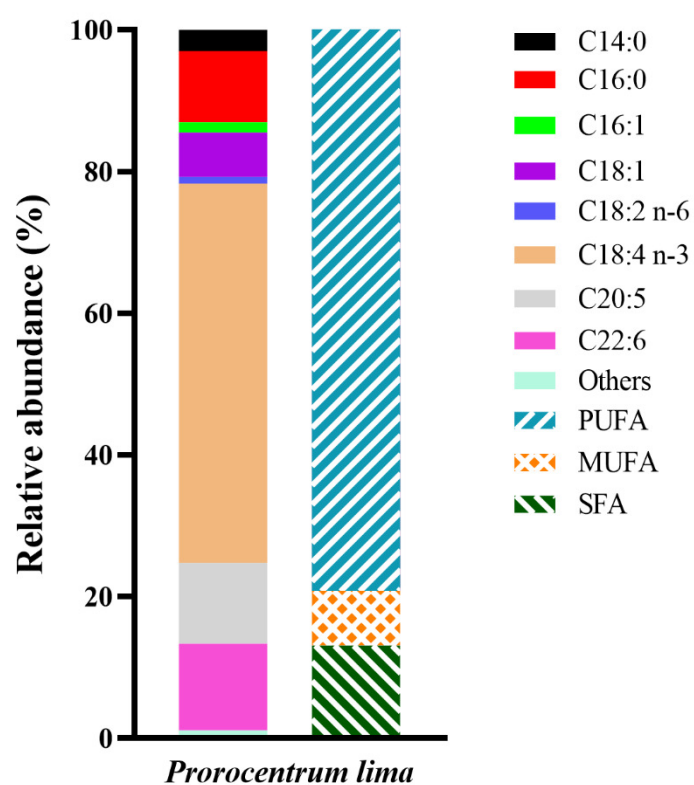

**Supplementary Figure S2** Relative abundance (%) of fatty acids in *Prorocentrum lima* strain CCMP 2579. SFA, MUFA and PUFA represent saturated fatty acids, monounsaturated fatty acids and polyunsaturated fatty acids, respectively.
